# Supplementary material
Source: PubMed Central journal article supplement (PMC7654269)
Supplement: JVI.01505-20-s0001.pdf [file JVI.01505-20-s0001.pdf]

# **Biophysical and dynamic characterization of a fine-tuned binding of the human Respiratory Syncytial Virus M2-1 core domain to long RNAs**

Icaro P. Caruso<sup>1,2,3</sup>, Giovana C. Guimarães<sup>1</sup>, Vitor B. Machado<sup>1</sup>, Marcelo A. Fossey<sup>1,2</sup>, Dieter Willbold<sup>4</sup>, Fabio C. L. Almeida<sup>3,\*</sup>, Fátima P. Souza<sup>1,2,\*</sup>

<sup>1</sup>Multiuser Center for Biomolecular Innovation (CMIB), <sup>2</sup>Department of Physics, IBILCE/UNESP, 15054-000, São José do Rio Preto, SP, Brazil;

<sup>3</sup>National Center for Nuclear Magnetic Resonance of Macromolecules, Institute of Medical Biochemistry Leopoldo de Meis (IBqM) and National Center for Structural Biology and Bioimaging (CENABIO), UFRJ, 21941-590 Rio de Janeiro, RJ, Brazil

<sup>4</sup>Institute of Biological Information Processing, Structural Biochemistry and JuStruct (IBI-7), Forschungszentrum Jülich, 52425 Jülich; Institut für Physikalische Biologie, Heinrich-Heine-Universität Düsseldorf, Universitätsstraße, 40225 Düsseldorf, Germany.

\*Corresponding author e-mail address: [falmeida@bioqmed.ufrj.br](mailto:falmeida@bioqmed.ufrj.br)

[fatima.p.souza@unesp.br](mailto:fatima.p.souza@unesp.br)

Tel.: +55-21-31042326

Tel.: +55-17-32212240

## SUPPLEMENTARY MATERIAL

**Table S1.** Raw nuclear spin relaxation data ( $^{15}\text{N}$   $R_1$ ,  $R_2$  and hetNOE) of the cdM2-1 backbone in its free and RNA-bound state. [cdM2-1] = 350  $\mu\text{M}$ , [RNA] = 115  $\mu\text{M}$ , 25  $^\circ\text{C}$ , and 14.1 T ( $^1\text{H}$  frequency of 600 MHz).

| Res | cdM2-1 |           |        |           |        |            | cdM2-1 + RNA |           |        |           |        |            |
|-----|--------|-----------|--------|-----------|--------|------------|--------------|-----------|--------|-----------|--------|------------|
|     | $R_1$  | $\pm R_1$ | $R_2$  | $\pm R_2$ | hNOE   | $\pm$ hNOE | $R_1$        | $\pm R_1$ | $R_2$  | $\pm R_2$ | hNOE   | $\pm$ hNOE |
| 59  | 1.195  | 0.019     | 1.86   | 0.34      | -0.871 | 0.009      | 1.181        | 0.016     | 2.23   | 0.352     | -0.79  | 0.008      |
| 60  | 1.268  | 0.009     | 1.734  | 0.173     | -0.53  | 0.008      | 1.248        | 0.016     | 2.097  | 0.186     | -0.483 | 0.008      |
| 61  | 1.318  | 0.02      | 2.363  | 0.336     | -0.609 | 0.01       | 1.273        | 0.027     | 2.839  | 0.358     | -0.572 | 0.009      |
| 62  | 1.281  | 0.021     | 2.402  | 0.38      | -0.409 | 0.012      | 1.207        | 0.016     | 2.56   | 0.421     | -0.412 | 0.011      |
| 63  | 1.323  | 0.017     | 2.422  | 0.31      | -0.285 | 0.006      | 1.315        | 0.016     | 2.863  | 0.32      | -0.214 | 0.006      |
| 64  | 1.362  | 0.012     | 2.639  | 0.242     | -0.239 | 0.006      | 1.325        | 0.011     | 3.079  | 0.224     | -0.252 | 0.006      |
| 65  | 1.455  | 0.011     | 3.299  | 0.158     | -0.173 | 0.007      | 1.411        | 0.01      | 3.606  | 0.161     |        |            |
| 66  | 1.498  | 0.006     | 3.797  | 0.074     | 0.086  | 0.007      | 1.439        | 0.007     | 4.384  | 0.107     | 0.038  | 0.007      |
| 67  | 1.574  | 0.006     | 4.355  | 0.116     | 0.083  | 0.007      | 1.481        | 0.009     | 6.002  | 0.175     |        |            |
| 68  | 1.546  | 0.013     | 4.703  | 0.162     | 0.212  | 0.009      | 1.482        | 0.016     | 5.685  | 0.189     | 0.18   | 0.009      |
| 69  | 1.58   | 0.016     | 5.822  | 0.203     | 0.275  | 0.009      | 1.493        | 0.016     | 7.737  | 0.232     | 0.224  | 0.011      |
| 70  | 1.609  | 0.013     | 6.446  | 0.167     | 0.369  | 0.009      | 1.502        | 0.012     | 8.836  | 0.212     | 0.335  | 0.012      |
| 71  | 1.569  | 0.01      | 6.821  | 0.256     | 0.344  | 0.01       |              |           |        |           |        |            |
| 72  | 1.509  | 0.006     | 8.559  | 0.155     | 0.505  | 0.009      |              |           |        |           |        |            |
| 73  | 1.549  | 0.017     | 8.558  | 0.185     | 0.429  | 0.013      | 1.397        | 0.013     | 12.708 | 0.271     | 0.413  | 0.018      |
| 74  | 1.364  | 0.008     | 7.611  | 0.144     | 0.44   | 0.013      | 1.17         | 0.019     | 14.811 | 0.266     | 0.561  | 0.032      |
| 75  | 1.409  | 0.015     | 9.365  | 0.121     | 0.727  | 0.02       | 1.232        | 0.012     | 15.775 | 0.323     | 0.702  | 0.039      |
| 76  | 1.396  | 0.006     | 10.486 | 0.163     | 0.732  | 0.021      | 1.124        | 0.02      | 21.211 | 0.606     | 0.738  | 0.056      |
| 77  | 1.381  | 0.005     | 11.199 | 0.117     | 0.83   | 0.022      | 1.06         | 0.024     | 21.544 | 0.894     | 0.889  | 0.068      |
| 78  | 1.432  | 0.007     | 11.255 | 0.1       | 0.773  | 0.021      | 1.108        | 0.029     | 20.676 | 0.648     | 0.805  | 0.062      |
| 79  | 1.453  | 0.015     | 11.819 | 0.13      | 0.827  | 0.027      | 1.198        | 0.046     | 24.589 | 1.341     | 0.753  | 0.076      |
| 80  | 1.452  | 0.01      | 11.458 | 0.092     | 0.803  | 0.022      | 1.082        | 0.034     | 20.547 | 1.177     | 0.862  | 0.094      |
| 81  | 1.433  | 0.012     | 10.951 | 0.07      | 0.796  | 0.018      | 1.127        | 0.021     | 20.444 | 1.018     | 0.79   | 0.076      |
| 82  | 1.465  | 0.006     | 11.709 | 0.164     | 0.767  | 0.016      | 1.137        | 0.022     | 23.437 | 0.716     | 0.682  | 0.056      |
| 83  | 1.505  | 0.009     | 10.96  | 0.088     | 0.749  | 0.017      | 1.19         | 0.022     | 20.399 | 0.954     | 0.889  | 0.067      |
| 84  | 1.452  | 0.012     | 14.922 | 0.123     | 0.798  | 0.024      | 1.224        | 0.042     | 24.88  | 1.925     | 0.848  | 0.093      |
| 85  | 1.461  | 0.009     | 10.962 | 0.138     | 0.761  | 0.017      | 1.174        | 0.025     | 19.923 | 0.644     | 0.844  | 0.056      |
| 86  | 1.479  | 0.008     | 10.73  | 0.166     | 0.761  | 0.016      | 1.16         | 0.027     | 20.553 | 0.84      | 0.738  | 0.05       |
| 87  | 1.421  | 0.009     | 16.194 | 0.169     | 0.77   | 0.023      | 1.14         | 0.023     | 24.944 | 0.574     | 0.792  | 0.059      |
| 88  | 1.463  | 0.016     | 16.649 | 0.261     | 0.739  | 0.026      | 1.122        | 0.035     | 27.645 | 1.304     | 0.659  | 0.077      |
| 89  | 1.449  | 0.016     | 12.658 | 0.263     | 0.708  | 0.017      | 1.165        | 0.017     | 20.489 | 0.72      | 0.713  | 0.045      |
| 90  | 1.278  | 0.008     | 11.008 | 0.161     | 0.649  | 0.019      |              |           |        |           |        |            |
| 91  |        |           |        |           | 0.754  | 0.02       |              |           |        |           |        |            |
| 92  | 1.437  | 0.021     | 11.59  | 0.244     | 0.836  | 0.024      | 1.051        | 0.089     | 22.116 | 2.475     | 1.091  | 0.215      |
| 93  | 1.429  | 0.008     | 11.589 | 0.165     | 0.775  | 0.017      |              |           |        |           |        |            |
| 94  | 1.45   | 0.007     | 11.087 | 0.223     | 0.795  | 0.017      | 1.042        | 0.035     | 22.841 | 1.288     | 0.69   | 0.072      |
| 95  | 1.443  | 0.01      | 11.717 | 0.157     | 0.783  | 0.02       | 1.112        | 0.016     | 23.941 | 0.777     | 0.703  | 0.063      |
| 96  |        |           |        |           | 0.809  | 0.018      |              |           |        |           |        |            |
| 97  | 1.407  | 0.006     | 11.337 | 0.117     | 0.741  | 0.017      | 1.035        | 0.032     | 21.201 | 1.056     | 0.584  | 0.063      |
| 98  | 1.458  | 0.011     | 11.755 | 0.144     | 0.783  | 0.022      | 1.13         | 0.038     | 23.609 | 0.842     | 0.753  | 0.066      |
| 99  | 1.395  | 0.006     | 11.445 | 0.103     | 0.767  | 0.014      |              |           |        |           |        |            |
| 100 | 1.339  | 0.003     | 9.865  | 0.14      | 0.767  | 0.016      |              |           |        |           | 0.576  | 0.047      |
| 101 | 1.429  | 0.006     | 11.639 | 0.106     | 0.776  | 0.017      | 1.091        | 0.028     | 23.224 | 0.936     | 0.807  | 0.07       |
| 102 | 1.398  | 0.01      | 10.866 | 0.141     | 0.793  | 0.018      | 1.095        | 0.023     | 23.316 | 0.781     | 0.688  | 0.068      |
| 103 | 1.406  | 0.006     | 11.872 | 0.093     | 0.796  | 0.02       | 1.057        | 0.036     | 23.601 | 1.262     | 0.792  | 0.085      |
| 104 | 1.423  | 0.008     | 10.45  | 0.129     | 0.66   | 0.013      |              |           |        |           | 0.543  | 0.033      |
| 105 | 1.443  | 0.008     | 10.976 | 0.109     | 0.735  | 0.015      | 1.082        | 0.027     | 22.394 | 0.573     | 0.663  | 0.05       |
| 106 |        |           |        |           | 0.737  | 0.009      |              |           |        |           |        |            |
| 107 | 1.312  | 0.008     | 9.355  | 0.096     | 0.714  | 0.018      | 1.036        | 0.023     | 18.079 | 0.54      | 0.641  | 0.05       |
| 108 | 1.42   | 0.02      | 11.696 | 0.274     | 0.763  | 0.023      | 1.073        | 0.035     | 21.578 | 0.77      | 0.859  | 0.082      |

|     |       |       |        |       |       |       |       |       |        |       |       |       |
|-----|-------|-------|--------|-------|-------|-------|-------|-------|--------|-------|-------|-------|
| 109 | 1.422 | 0.007 | 11.269 | 0.207 | 0.762 | 0.013 | 1.126 | 0.011 | 21.998 | 0.343 | 0.823 | 0.036 |
| 110 | 1.288 | 0.006 | 11.286 | 0.142 | 0.728 | 0.015 | 1.025 | 0.009 | 21.932 | 0.448 | 0.768 | 0.051 |
| 111 |       |       |        |       | 0.737 | 0.009 |       |       |        |       |       |       |
| 112 | 1.409 | 0.006 | 11.449 | 0.106 | 0.769 | 0.017 | 1.169 | 0.026 | 23.162 | 0.892 | 0.744 | 0.054 |
| 113 | 1.338 | 0.005 | 11.633 | 0.089 | 0.75  | 0.013 | 1.061 | 0.015 | 22.239 | 0.458 | 0.762 | 0.046 |
| 114 | 1.327 | 0.006 | 11.453 | 0.09  | 0.72  | 0.016 | 1.053 | 0.02  | 20.789 | 0.641 | 0.82  | 0.062 |
| 115 | 1.389 | 0.005 | 11.68  | 0.129 | 0.771 | 0.017 | 1.113 | 0.013 | 20.01  | 0.649 | 0.682 | 0.053 |
| 116 | 1.391 | 0.005 | 11.556 | 0.091 | 0.755 | 0.014 |       |       |        |       |       |       |
| 117 |       |       |        |       | 0.738 | 0.014 | 0.992 | 0.019 | 21.981 | 0.379 | 0.729 | 0.043 |
| 118 | 1.361 | 0.006 | 10.103 | 0.092 | 0.752 | 0.013 | 1.066 | 0.016 | 20.018 | 0.393 | 0.739 | 0.037 |
| 119 | 1.283 | 0.006 | 10.73  | 0.065 | 0.603 | 0.013 | 1.034 | 0.019 | 19.743 | 0.619 | 0.565 | 0.041 |
| 121 | 1.347 | 0.01  | 10.719 | 0.229 | 0.698 | 0.022 | 1.047 | 0.025 | 19.657 | 0.515 | 0.526 | 0.056 |
| 122 | 1.385 | 0.005 | 10.518 | 0.085 | 0.705 | 0.011 |       |       |        |       |       |       |
| 124 | 1.386 | 0.005 | 11.424 | 0.14  | 0.717 | 0.016 | 1.079 | 0.018 | 23.542 | 0.649 | 0.671 | 0.053 |
| 125 | 1.387 | 0.007 | 11.365 | 0.13  | 0.739 | 0.016 | 1.073 | 0.033 | 20.643 | 0.79  | 0.695 | 0.058 |
| 126 | 1.407 | 0.006 | 10.558 | 0.076 | 0.735 | 0.013 |       |       |        |       |       |       |
| 127 | 1.364 | 0.006 | 11.444 | 0.085 | 0.791 | 0.016 | 1.041 | 0.016 | 23.756 | 0.877 | 0.773 | 0.059 |
| 128 | 1.386 | 0.008 | 11.662 | 0.098 | 0.803 | 0.015 | 1.048 | 0.019 | 23.328 | 0.785 | 0.776 | 0.06  |
| 129 | 1.42  | 0.005 | 11.53  | 0.119 | 0.81  | 0.015 | 1.138 | 0.026 | 22.565 | 0.834 | 0.846 | 0.064 |
| 130 | 1.428 | 0.008 | 10.963 | 0.137 | 0.77  | 0.014 | 1.122 | 0.017 | 21.739 | 0.706 | 0.707 | 0.043 |
| 131 | 1.417 | 0.006 | 11.65  | 0.163 | 0.77  | 0.017 | 1.094 | 0.028 | 21.295 | 0.895 | 0.982 | 0.083 |
| 132 | 1.404 | 0.009 | 11.671 | 0.1   | 0.823 | 0.019 | 1.106 | 0.032 | 21.741 | 0.828 | 0.75  | 0.08  |
| 133 | 1.451 | 0.004 | 11.153 | 0.105 | 0.756 | 0.013 | 1.121 | 0.018 | 21.617 | 0.404 | 0.954 | 0.058 |
| 134 |       |       |        |       | 0.758 | 0.014 | 1.094 | 0.017 | 20.703 | 0.427 | 0.678 | 0.042 |
| 135 | 1.386 | 0.012 | 11.964 | 0.082 | 0.808 | 0.02  | 1.091 | 0.044 | 23.895 | 1.452 | 0.674 | 0.085 |
| 136 | 1.444 | 0.01  | 11.529 | 0.111 | 0.781 | 0.018 | 1.109 | 0.024 | 20.948 | 0.725 | 0.912 | 0.079 |
| 137 | 1.44  | 0.007 | 11.148 | 0.09  | 0.803 | 0.015 | 1.106 | 0.016 | 22.223 | 0.746 | 0.83  | 0.056 |
| 138 | 1.475 | 0.01  | 12.315 | 0.12  | 0.794 | 0.018 | 1.148 | 0.034 | 27.583 | 2.168 | 0.68  | 0.068 |
| 139 | 1.361 | 0.006 | 11.63  | 0.148 | 0.803 | 0.016 | 1.01  | 0.016 | 21.131 | 0.44  | 0.713 | 0.049 |
| 140 | 1.41  | 0.006 | 10.293 | 0.095 | 0.7   | 0.014 | 1.118 | 0.018 | 20.566 | 0.46  | 0.691 | 0.043 |
| 141 | 1.348 | 0.003 | 10.464 | 0.13  | 0.751 | 0.013 | 1.051 | 0.012 | 20.939 | 0.368 | 0.659 | 0.034 |
| 142 |       |       |        |       | 0.809 | 0.018 |       |       |        |       |       |       |
| 143 | 1.459 | 0.007 | 10.53  | 0.119 | 0.728 | 0.01  | 1.115 | 0.016 | 20.075 | 0.474 | 0.661 | 0.035 |
| 144 | 1.479 | 0.009 | 10.57  | 0.145 | 0.743 | 0.014 | 1.129 | 0.022 | 22.003 | 0.623 | 0.773 | 0.068 |
| 145 | 1.47  | 0.007 | 10.797 | 0.169 | 0.774 | 0.016 | 1.171 | 0.028 | 21.535 | 0.816 | 0.715 | 0.067 |
| 146 | 1.46  | 0.006 | 8.646  | 0.195 | 0.59  | 0.016 | 1.124 | 0.037 | 20.934 | 0.678 | 0.727 | 0.073 |
| 147 | 1.491 | 0.007 | 10.701 | 0.097 | 0.789 | 0.014 |       |       |        |       |       |       |
| 148 |       |       |        |       | 0.718 | 0.015 |       |       |        |       |       |       |
| 149 | 1.488 | 0.007 | 10.847 | 0.102 | 0.824 | 0.02  |       |       |        |       |       |       |
| 150 | 1.462 | 0.006 | 10.937 | 0.084 | 0.747 | 0.015 |       |       |        |       |       |       |
| 151 |       |       |        |       | 0.768 | 0.014 | 0.987 | 0.03  | 19.496 | 2.513 | 0.877 | 0.133 |
| 152 | 1.437 | 0.008 | 11.164 | 0.102 | 0.786 | 0.015 | 1.016 | 0.085 | 22.222 | 2.615 | 0.709 | 0.142 |
| 154 | 1.358 | 0.028 | 12.435 | 0.55  | 0.673 | 0.041 |       |       |        |       |       |       |
| 155 | 1.494 | 0.007 | 10.753 | 0.157 | 0.777 | 0.012 | 1.089 | 0.044 | 25.784 | 1.371 | 0.762 | 0.078 |
| 156 | 1.347 | 0.007 | 10.802 | 0.123 | 0.798 | 0.017 | 0.994 | 0.042 | 26.527 | 1.077 | 0.896 | 0.142 |
| 157 | 1.444 | 0.01  | 11.865 | 0.134 | 0.809 | 0.018 | 1.091 | 0.039 | 24.516 | 2.36  | 1.005 | 0.137 |
| 158 | 1.439 | 0.007 | 11.156 | 0.108 | 0.815 | 0.019 | 1.089 | 0.029 | 22     | 0.919 | 0.825 | 0.091 |
| 159 | 1.422 | 0.008 | 11.408 | 0.093 | 0.785 | 0.014 | 1.074 | 0.028 | 23.952 | 0.756 | 0.71  | 0.06  |
| 160 | 1.432 | 0.004 | 11.425 | 0.187 | 0.818 | 0.018 | 1.03  | 0.027 | 23.326 | 0.857 | 0.738 | 0.067 |
| 161 | 1.468 | 0.005 | 11.791 | 0.142 | 0.782 | 0.02  | 1.063 | 0.038 | 21.8   | 1.271 | 0.786 | 0.093 |
| 162 | 1.481 | 0.011 | 10.672 | 0.103 | 0.8   | 0.017 | 1.113 | 0.03  | 23.546 | 0.721 | 0.859 | 0.075 |
| 163 | 1.42  | 0.007 | 11.586 | 0.075 | 0.801 | 0.015 | 1.036 | 0.018 | 24.439 | 0.627 | 0.887 | 0.061 |
| 164 | 1.433 | 0.009 | 11.604 | 0.102 | 0.821 | 0.021 | 1.02  | 0.026 | 27.194 | 1.211 | 0.908 | 0.103 |
| 165 | 1.48  | 0.006 | 11.501 | 0.08  | 0.812 | 0.019 | 1.087 | 0.033 | 23.281 | 0.797 | 0.942 | 0.085 |
| 166 | 1.436 | 0.003 | 11.247 | 0.08  | 0.779 | 0.015 |       |       |        |       | 0.898 | 0.074 |
| 167 | 1.386 | 0.01  | 11.209 | 0.107 | 0.79  | 0.018 | 1.083 | 0.018 | 24.593 | 0.645 | 0.724 | 0.062 |
| 168 | 1.443 | 0.007 | 11.52  | 0.11  | 0.784 | 0.017 | 1.087 | 0.023 | 22.241 | 0.86  | 0.694 | 0.063 |
| 169 | 1.479 | 0.007 | 11.117 | 0.109 | 0.782 | 0.016 | 1.122 | 0.027 | 22.291 | 0.739 | 0.697 | 0.056 |
| 170 | 1.385 | 0.007 | 10.487 | 0.087 | 0.704 | 0.013 | 1.061 | 0.011 | 21.028 | 0.465 | 0.663 | 0.041 |
| 171 | 1.409 | 0.007 | 10.662 | 0.071 | 0.741 | 0.016 | 1.087 | 0.014 | 22.71  | 0.606 | 0.644 | 0.047 |
| 172 | 1.487 | 0.006 | 9.527  | 0.136 | 0.643 | 0.013 | 1.202 | 0.016 | 17.295 | 0.401 | 0.618 | 0.031 |

|     |       |       |       |       |        |       |       |       |       |       |        |       |
|-----|-------|-------|-------|-------|--------|-------|-------|-------|-------|-------|--------|-------|
| 173 | 1.536 | 0.004 | 7.348 | 0.1   | 0.492  | 0.009 | 1.345 | 0.01  | 12.38 | 0.148 | 0.406  | 0.015 |
| 174 |       |       |       |       | 0.15   | 0.005 |       |       |       |       |        |       |
| 177 | 1.15  | 0.002 | 1.838 | 0.028 | -0.739 | 0.006 | 1.137 | 0.003 | 2.106 | 0.021 | -0.688 | 0.006 |

**Table S2.** Average  $^{15}\text{N}$  relaxation rates and reduced spectral density values of secondary structure elements of cdM2-1 in absence and presence of RNA. [cdM2-1] = 350  $\mu\text{M}$ , [RNA] = 115  $\mu\text{M}$ , 25  $^{\circ}\text{C}$ , and 14.1 T ( $^1\text{H}$  frequency of 600 MHz).

|            | Protein Region | $R_1$<br>[s $^{-1}$ ] | $R_2$<br>[s $^{-1}$ ] | $R_2/R_1$<br>[s $^{-1}$ ] | hetNOE    | $J(0.87\omega_H)$<br>[ps] | $J(\omega_N)$<br>[ps] | $J(0)$<br>[ns] |
|------------|----------------|-----------------------|-----------------------|---------------------------|-----------|---------------------------|-----------------------|----------------|
| cdM2-1     | Helical region | 1.42±0.05             | 11.3±1.1              | 8.0±0.8                   | 0.76±0.05 | 5.2±1.0                   | 258±10                | 3.0±0.3        |
|            | $\alpha 1$     | 1.44±0.03             | 11.0±1.0              | 7.9±0.9                   | 0.78±0.04 | 5.0±0.8                   | 262±6                 | 3.0±0.4        |
|            | loop 1         | 1.42±0.08             | 13.4±2.8              | 9.5±1.8                   | 0.73±0.04 | 6.0±0.8                   | 256±16                | 3.6±0.8        |
|            | $\alpha 2$     | 1.41±0.03             | 11.2±0.6              | 7.9±0.3                   | 0.76±0.04 | 5.1±0.9                   | 258±6                 | 3.0±0.2        |
|            | loop 2         | 1.31±0.01             | 9.4±0.1               | 7.1±0.1                   | 0.72±0.02 | 5.8±0.4                   | 237±2                 | 2.44±0.03      |
|            | $\alpha 3$     | 1.37±0.05             | 11.5±0.2              | 8.4±0.3                   | 0.75±0.02 | 5.3±0.2                   | 249±10                | 3.03±0.05      |
|            | loop 3         | 1.34±0.04             | 10.5±0.3              | 7.8±0.4                   | 0.69±0.06 | 6.5±1.1                   | 242±9                 | 2.76±0.08      |
|            | $\alpha 4$     | 1.41±0.03             | 11.4±0.5              | 8.1±0.4                   | 0.77±0.04 | 4.9±0.8                   | 257±6                 | 3.0±0.1        |
|            | loop 4         | 1.35±0.01             | 10.5±0.1              | 7.8±0.1                   | 0.78±0.04 | 5.2±0.3                   | 245±1                 | 2.75±0.04      |
|            | $\alpha 5$     | 1.47±0.01             | 10.4±0.8              | 7.1±0.5                   | 0.74±0.07 | 5.9±1.7                   | 267±5                 | 2.7±0.2        |
|            | loop 5         | 1.40±0.05             | 11.8±0.9              | 8.5±1.0                   | 0.73±0.08 | 5.9±1.5                   | 253±13                | 3.1±0.2        |
| $\alpha 6$ | 1.44±0.04      | 11.2±0.4              | 7.8±0.3               | 0.79±0.03                 | 4.7±0.6   | 262±7                     | 2.9±0.1               |                |
| cdM2-1/RNA | Helical region | 1.09±0.05             | 22.2±2.1              | 20.4±2.2                  | 0.76±0.10 | 4.1±1.6                   | 198±10                | 6.1±0.5        |
|            | $\alpha 1$     | 1.15±0.06             | 21.2±2.5              | 18.5±2.3                  | 0.80±0.07 | 3.6±1.4                   | 210±10                | 5.8±0.7        |
|            | loop 1         | 1.15±0.02             | 23.4±3.5              | 20.4±3.4                  | 0.72±0.05 | 4.9±0.9                   | 207±4                 | 6.4±1.0        |
|            | $\alpha 2$     | 1.08±0.03             | 22.9±0.9              | 21.3±0.6                  | 0.72±0.15 | 4.9±1.1                   | 195±7                 | 6.3±0.2        |
|            | loop 2         | 1.04±0.02             | 18.1±0.5              | 17.4±0.6                  | 0.64±0.05 | 5.8±0.8                   | 185±4                 | 4.9±0.1        |
|            | $\alpha 3$     | 1.08±0.06             | 21.7±0.9              | 20.2±1.3                  | 0.77±0.06 | 3.8±1.0                   | 196±10                | 5.9±0.3        |
|            | loop 3         | 1.05±0.02             | 19.8±0.2              | 18.9±0.2                  | 0.61±0.11 | 6.4±1.8                   | 187±5                 | 5.4±0.1        |
|            | $\alpha 4$     | 1.09±0.04             | 22.3±1.8              | 20.4±1.6                  | 0.77±0.10 | 3.9±1.8                   | 199±8                 | 6.1±0.5        |
|            | loop 4         | 1.05±0.01             | 20.9±0.4              | 19.9±0.4                  | 0.66±0.03 | 5.6±0.5                   | 188±2                 | 5.7±0.1        |
|            | $\alpha 5$     | 1.11±0.07             | 20.8±1.0              | 18.8±0.7                  | 0.75±0.08 | 4.3±1.5                   | 200±11                | 5.7±0.3        |
|            | loop 5         | 1.01±0.08             | 22.2±2.6              | 21.9±3.2                  | 0.71±0.14 | 4.6±2.3                   | 183±16                | 6.1±0.7        |
| $\alpha 6$ | 1.07±0.03      | 23.7±1.7              | 22.2±2.1              | 0.80±0.11                 | 3.4±1.8   | 195±6                     | 6.5±0.5               |                |

**Table S3.** Extended model-free parameters for the RNA-free cdM2-1 calculated from Lipari-Szabo formalism by using TENSOR2 program (1). [cdM2-1] = 350  $\mu\text{M}$ , 25  $^{\circ}\text{C}$ , and 14.1 T ( $^1\text{H}$  frequency of 600 MHz).

| Residue | Model | $\chi^2$ | $S^2$  | $\pm S^2$ | $\tau_e$                 | $\pm\tau_e$              | $R_{ex}$ | $\pm R_{ex}$ | $S_1^2$ | $\pm S_1^2$ |
|---------|-------|----------|--------|-----------|--------------------------|--------------------------|----------|--------------|---------|-------------|
| 59      | 4     | 0        | 0.2098 | 0.01      | $7.658 \times 10^{-10}$  | $6.1701 \times 10^{-12}$ | 1.6252   | 0.3463       | 1       | 0           |
| 60      | 5     | 0        | 0.0359 | 0.0218    | $8.0663 \times 10^{-10}$ | $1.3369 \times 10^{-11}$ | 0        | 0            | 0.7228  | 0.0087      |
| 61      | 5     | 0        | 0.102  | 0.0373    | $7.3078 \times 10^{-10}$ | $2.4301 \times 10^{-11}$ | 0        | 0            | 0.791   | 0.0169      |
| 62      | 5     | 0        | 0.1127 | 0.0445    | $8.2225 \times 10^{-10}$ | $2.9419 \times 10^{-11}$ | 0        | 0            | 0.7334  | 0.02        |
| 63      | 5     | 0        | 0.1175 | 0.0397    | $8.8646 \times 10^{-10}$ | $2.7558 \times 10^{-11}$ | 0        | 0            | 0.7288  | 0.0161      |
| 64      | 5     | 0        | 0.1252 | 0.0282    | $9.1484 \times 10^{-10}$ | $1.837 \times 10^{-11}$  | 0        | 0            | 0.7458  | 0.0118      |
| 65      | 5     | 0        | 0.1851 | 0.0163    | $9.1562 \times 10^{-10}$ | $1.2888 \times 10^{-11}$ | 0        | 0            | 0.8027  | 0.0087      |
| 66      | 5     | 0        | 0.233  | 0.0081    | $1.1118 \times 10^{-9}$  | $1.0021 \times 10^{-11}$ | 0        | 0            | 0.7759  | 0.0043      |
| 67      | 5     | 0        | 0.2692 | 0.0114    | $1.0766 \times 10^{-9}$  | $1.3397 \times 10^{-11}$ | 0        | 0            | 0.8334  | 0.0063      |

|     |   |         |        |        |                          |                          |        |        |        |        |
|-----|---|---------|--------|--------|--------------------------|--------------------------|--------|--------|--------|--------|
| 68  | 5 | 0       | 0.3188 | 0.0168 | $1.1932 \times 10^{-9}$  | $2.1148 \times 10^{-11}$ | 0      | 0      | 0.801  | 0.0098 |
| 69  | 5 | 0       | 0.4353 | 0.0206 | $1.1474 \times 10^{-9}$  | $3.0647 \times 10^{-11}$ | 0      | 0      | 0.8507 | 0.0122 |
| 70  | 5 | 0       | 0.4685 | 0.0136 | $1.289 \times 10^{-9}$   | $2.6651 \times 10^{-11}$ | 0      | 0      | 0.8587 | 0.0095 |
| 71  | 5 | 0       | 0.5101 | 0.0202 | $1.1731 \times 10^{-9}$  | $3.6049 \times 10^{-11}$ | 0      | 0      | 0.871  | 0.0128 |
| 72  | 5 | 0       | 0.7113 | 0.0116 | $1.113 \times 10^{-9}$   | $4.2957 \times 10^{-11}$ | 0      | 0      | 0.8902 | 0.0083 |
| 73  | 5 | 0       | 0.6755 | 0.0143 | $1.0116 \times 10^{-9}$  | $4.4876 \times 10^{-11}$ | 0      | 0      | 0.9234 | 0.0111 |
| 74  | 5 | 0       | 0.6832 | 0.0121 | $1.018 \times 10^{-9}$   | $4.1482 \times 10^{-11}$ | 0      | 0      | 0.8142 | 0.0078 |
| 75  | 5 | 0       | 0.8885 | 0.0119 | $1.4695 \times 10^{-9}$  | $2.829 \times 10^{-10}$  | 0      | 0      | 0.8423 | 0.0099 |
| 76  | 5 | 0       | 0.9409 | 0.0125 | $8.5909 \times 10^{-10}$ | $2.964 \times 10^{-10}$  | 0      | 0      | 0.8876 | 0.0132 |
| 77  | 1 | 0.26701 | 0.8932 | 0.0033 | 0                        | 0                        | 0      | 0      | 1      | 0      |
| 78  | 1 | 5.2035  | 0.9146 | 0.004  | 0                        | 0                        | 0      | 0      | 1      | 0      |
| 79  | 3 | 0.10012 | 0.9207 | 0.0098 | 0                        | 0                        | 0.5414 | 0.1878 | 1      | 0      |
| 80  | 1 | 0.55466 | 0.9276 | 0.0046 | 0                        | 0                        | 0      | 0      | 1      | 0      |
| 81  | 5 | 0       | 0.9712 | 0.009  | $1.6079 \times 10^{-9}$  | $2.4817 \times 10^{-9}$  | 0      | 0      | 0.9034 | 0.0082 |
| 82  | 4 | 0       | 0.9166 | 0.0051 | $3.7592 \times 10^{-11}$ | $1.0271 \times 10^{-11}$ | 0.4757 | 0.1679 | 1      | 0      |
| 83  | 5 | 0       | 0.9374 | 0.0074 | $1.1485 \times 10^{-9}$  | $2.4569 \times 10^{-10}$ | 0      | 0      | 0.9377 | 0.0063 |
| 84  | 3 | 0.71406 | 0.9246 | 0.0075 | 0                        | 0                        | 3.5325 | 0.1568 | 1      | 0      |
| 85  | 5 | 0       | 0.9526 | 0.0091 | $1.0526 \times 10^{-9}$  | $3.1883 \times 10^{-10}$ | 0      | 0      | 0.9217 | 0.0091 |
| 86  | 5 | 0       | 0.9541 | 0.0113 | $1.0071 \times 10^{-9}$  | $4.5211 \times 10^{-10}$ | 0      | 0      | 0.9189 | 0.0108 |
| 87  | 4 | 0       | 0.9062 | 0.0077 | $3.0475 \times 10^{-11}$ | $1.3091 \times 10^{-11}$ | 4.8611 | 0.1928 | 1      | 0      |
| 88  | 4 | 0       | 0.9477 | 0.0111 | $1.0354 \times 10^{-10}$ | $5.4563 \times 10^{-11}$ | 4.4945 | 0.2915 | 1      | 0      |
| 89  | 4 | 0       | 0.9302 | 0.0111 | $1.0735 \times 10^{-10}$ | $3.6407 \times 10^{-11}$ | 0.7294 | 0.3026 | 1      | 0      |
| 90  | 4 | 0       | 0.795  | 0.0066 | $4.4142 \times 10^{-11}$ | $4.52 \times 10^{-12}$   | 0.9954 | 0.185  | 1      | 0      |
| 92  | 1 | 0.46323 | 0.9273 | 0.011  | 0                        | 0                        | 0      | 0      | 1      | 0      |
| 93  | 2 | 0.12227 | 0.9207 | 0.0058 | $3.4487 \times 10^{-11}$ | $1.1912 \times 10^{-11}$ | 0      | 0      | 1      | 0      |
| 94  | 5 | 0       | 0.9671 | 0.0145 | $1.6755 \times 10^{-9}$  | $2.2565 \times 10^{-9}$  | 0      | 0      | 0.9143 | 0.0141 |
| 95  | 1 | 3.1494  | 0.9339 | 0.006  | 0                        | 0                        | 0      | 0      | 1      | 0      |
| 97  | 4 | 0       | 0.8953 | 0.0048 | $2.6385 \times 10^{-11}$ | $8.8336 \times 10^{-12}$ | 0.3549 | 0.1357 | 1      | 0      |
| 98  | 1 | 2.8853  | 0.9396 | 0.006  | 0                        | 0                        | 0      | 0      | 1      | 0      |
| 99  | 4 | 0       | 0.8905 | 0.005  | $2.733 \times 10^{-11}$  | $7.0879 \times 10^{-12}$ | 0.2854 | 0.1217 | 1      | 0      |
| 100 | 5 | 0       | 0.9114 | 0.0096 | $1.9725 \times 10^{-9}$  | $7.2873 \times 10^{-10}$ | 0      | 0      | 0.8281 | 0.0084 |
| 101 | 2 | 1.6289  | 0.9191 | 0.0046 | $2.611 \times 10^{-11}$  | $1.1177 \times 10^{-11}$ | 0      | 0      | 1      | 0      |
| 102 | 5 | 0       | 0.9665 | 0.0114 | $1.6126 \times 10^{-9}$  | $2.2961 \times 10^{-9}$  | 0      | 0      | 0.8884 | 0.0116 |
| 103 | 3 | 1.4586  | 0.917  | 0.0038 | 0                        | 0                        | 0.2892 | 0.1008 | 1      | 0      |
| 104 | 5 | 0       | 0.8805 | 0.0091 | $9.7263 \times 10^{-10}$ | $9.3315 \times 10^{-11}$ | 0      | 0      | 0.9079 | 0.0074 |
| 105 | 5 | 0       | 0.9473 | 0.0078 | $7.9123 \times 10^{-10}$ | $1.9085 \times 10^{-10}$ | 0      | 0      | 0.9224 | 0.0067 |
| 107 | 5 | 0       | 0.9026 | 0.0089 | $1.1819 \times 10^{-9}$  | $1.7391 \times 10^{-10}$ | 0      | 0      | 0.8147 | 0.0067 |
| 108 | 4 | 0       | 0.8931 | 0.0131 | $3.0719 \times 10^{-11}$ | $1.1647 \times 10^{-11}$ | 0.6765 | 0.3185 | 1      | 0      |
| 109 | 2 | 0.05724 | 0.9016 | 0.0049 | $3.3728 \times 10^{-11}$ | $6.8438 \times 10^{-12}$ | 0      | 0      | 1      | 0      |
| 110 | 4 | 0       | 0.8249 | 0.005  | $2.7826 \times 10^{-11}$ | $4.2359 \times 10^{-12}$ | 0.8013 | 0.1493 | 1      | 0      |
| 112 | 4 | 0       | 0.8913 | 0.0052 | $2.6592 \times 10^{-11}$ | $8.3969 \times 10^{-12}$ | 0.4009 | 0.1252 | 1      | 0      |
| 113 | 4 | 0       | 0.8579 | 0.0042 | $2.6816 \times 10^{-11}$ | $4.502 \times 10^{-12}$  | 0.7924 | 0.1001 | 1      | 0      |
| 114 | 4 | 0       | 0.8463 | 0.005  | $3.5662 \times 10^{-11}$ | $4.9792 \times 10^{-12}$ | 0.721  | 0.1064 | 1      | 0      |
| 115 | 4 | 0       | 0.879  | 0.0052 | $3.7679 \times 10^{-11}$ | $7.4201 \times 10^{-12}$ | 0.5029 | 0.1273 | 1      | 0      |
| 116 | 4 | 0       | 0.8866 | 0.0039 | $3.2551 \times 10^{-11}$ | $6.3567 \times 10^{-12}$ | 0.4327 | 0.0946 | 1      | 0      |
| 118 | 5 | 0       | 0.9525 | 0.0072 | $9.0964 \times 10^{-10}$ | $1.9956 \times 10^{-12}$ | 0      | 0      | 0.8567 | 0.0054 |
| 119 | 4 | 0       | 0.7706 | 0.0043 | $5.0437 \times 10^{-11}$ | $2.9214 \times 10^{-12}$ | 1.2515 | 0.0818 | 1      | 0      |
| 121 | 2 | 2.2223  | 0.8396 | 0.0072 | $3.9978 \times 10^{-11}$ | $6.8082 \times 10^{-12}$ | 0      | 0      | 1      | 0      |
| 122 | 2 | 2.9424  | 0.8584 | 0.0033 | $4.8594 \times 10^{-11}$ | $4.2949 \times 10^{-12}$ | 0      | 0      | 1      | 0      |
| 124 | 4 | 0       | 0.8796 | 0.0043 | $4.9169 \times 10^{-11}$ | $6.8322 \times 10^{-12}$ | 0.3206 | 0.1466 | 1      | 0      |
| 125 | 2 | 0.5618  | 0.8902 | 0.0049 | $4.0626 \times 10^{-11}$ | $7.5932 \times 10^{-12}$ | 0      | 0      | 1      | 0      |
| 126 | 5 | 0       | 0.9534 | 0.0092 | $6.6495 \times 10^{-10}$ | $1.5364 \times 10^{-10}$ | 0      | 0      | 0.8943 | 0.0097 |
| 127 | 3 | 3.0646  | 0.8779 | 0.0035 | 0                        | 0                        | 0.5121 | 0.1015 | 1      | 0      |
| 128 | 1 | 3.0936  | 0.9113 | 0.0042 | 0                        | 0                        | 0      | 0      | 1      | 0      |
| 129 | 1 | 0.9469  | 0.917  | 0.0028 | 0                        | 0                        | 0      | 0      | 1      | 0      |
| 130 | 2 | 0.01512 | 0.8947 | 0.0057 | $2.7401 \times 10^{-11}$ | $7.3341 \times 10^{-12}$ | 0      | 0      | 1      | 0      |
| 131 | 4 | 0       | 0.9    | 0.0056 | $2.8586 \times 10^{-11}$ | $9.4167 \times 10^{-12}$ | 0.4462 | 0.1683 | 1      | 0      |
| 132 | 1 | 0.71086 | 0.9189 | 0.0049 | 0                        | 0                        | 0      | 0      | 1      | 0      |
| 133 | 2 | 0.51786 | 0.9097 | 0.0035 | $4.3724 \times 10^{-11}$ | $7.5973 \times 10^{-12}$ | 0      | 0      | 1      | 0      |
| 135 | 4 | 0       | 0.8871 | 0.0084 | $3.1256 \times 10^{-11}$ | $6.7178 \times 10^{-12}$ | 0.7928 | 0.1325 | 1      | 0      |
| 136 | 1 | 5.2284  | 0.9288 | 0.0053 | 0                        | 0                        | 0      | 0      | 1      | 0      |

|     |   |         |        |        |                          |                          |        |        |        |        |
|-----|---|---------|--------|--------|--------------------------|--------------------------|--------|--------|--------|--------|
| 137 | 1 | 1.1943  | 0.9114 | 0.0035 | 0                        | 0                        | 0      | 0      | 1      | 0      |
| 138 | 3 | 1.8578  | 0.943  | 0.0066 | 0                        | 0                        | 0.6567 | 0.1424 | 1      | 0      |
| 139 | 3 | 1.0895  | 0.8874 | 0.0041 | 0                        | 0                        | 0.4314 | 0.1484 | 1      | 0      |
| 140 | 5 | 0       | 0.9278 | 0.0077 | $7.4509 \times 10^{-10}$ | $1.1759 \times 10^{-10}$ | 0      | 0      | 0.8916 | 0.0053 |
| 141 | 2 | 0.13083 | 0.8451 | 0.0031 | $2.3747 \times 10^{-11}$ | $4.1537 \times 10^{-12}$ | 0      | 0      | 1      | 0      |
| 143 | 5 | 0       | 0.9393 | 0.0081 | $8.3251 \times 10^{-10}$ | $1.5723 \times 10^{-10}$ | 0      | 0      | 0.9118 | 0.0063 |
| 144 | 5 | 0       | 0.9235 | 0.0099 | $1.2821 \times 10^{-9}$  | $2.2653 \times 10^{-10}$ | 0      | 0      | 0.9133 | 0.0084 |
| 145 | 5 | 0       | 0.9499 | 0.0132 | $1.4184 \times 10^{-9}$  | $7.236 \times 10^{-10}$  | 0      | 0      | 0.9135 | 0.014  |
| 146 | 5 | 0       | 0.7791 | 0.0157 | $1.1681 \times 10^{-9}$  | $8.7681 \times 10^{-11}$ | 0      | 0      | 0.8589 | 0.011  |
| 147 | 5 | 0       | 0.9437 | 0.0093 | $2.1837 \times 10^{-9}$  | $1.6845 \times 10^{-9}$  | 0      | 0      | 0.9096 | 0.007  |
| 149 | 6 | 0.27387 | 0.915  | 0.0145 | $8.5352 \times 10^{-9}$  | $2.7416 \times 10^{-9}$  | 0      | 0      | 0.9081 | 0.0058 |
| 150 | 2 | 2.3307  | 0.9031 | 0.0042 | $4.9879 \times 10^{-11}$ | $8.2221 \times 10^{-12}$ | 0      | 0      | 1      | 0      |
| 152 | 5 | 0       | 0.973  | 0.008  | $1.0634 \times 10^{-9}$  | $1.4617 \times 10^{-9}$  | 0      | 0      | 0.9167 | 0.0082 |
| 154 | 4 | 0       | 0.8558 | 0.0197 | $5.8574 \times 10^{-11}$ | $1.6668 \times 10^{-11}$ | 1.5625 | 0.5855 | 1      | 0      |
| 155 | 5 | 0       | 0.9204 | 0.011  | $2.1507 \times 10^{-9}$  | $7.2818 \times 10^{-10}$ | 0      | 0      | 0.912  | 0.0092 |
| 156 | 1 | 1.7409  | 0.8688 | 0.004  | 0                        | 0                        | 0      | 0      | 1      | 0      |
| 157 | 1 | 0.4883  | 0.9393 | 0.0052 | 0                        | 0                        | 0      | 0      | 1      | 0      |
| 158 | 5 | 0       | 0.9693 | 0.0092 | $5.0974 \times 10^{-9}$  | $3.1156 \times 10^{-9}$  | 0      | 0      | 0.9074 | 0.0064 |
| 159 | 2 | 0.03786 | 0.9113 | 0.0047 | $2.2808 \times 10^{-11}$ | $8.3209 \times 10^{-12}$ | 0      | 0      | 1      | 0      |
| 160 | 1 | 2.4286  | 0.9299 | 0.0027 | 0                        | 0                        | 0      | 0      | 1      | 0      |
| 161 | 1 | 3.7377  | 0.9486 | 0.003  | 0                        | 0                        | 0      | 0      | 1      | 0      |
| 162 | 5 | 0       | 0.918  | 0.0166 | $3.8136 \times 10^{-9}$  | $2.5011 \times 10^{-9}$  | 0      | 0      | 0.8967 | 0.0068 |
| 163 | 1 | 2.1651  | 0.9209 | 0.0037 | 0                        | 0                        | 0      | 0      | 1      | 0      |
| 164 | 1 | 1.3782  | 0.9285 | 0.0045 | 0                        | 0                        | 0      | 0      | 1      | 0      |
| 165 | 5 | 0       | 0.9743 | 0.0082 | $3.479 \times 10^{-9}$   | $3.1494 \times 10^{-9}$  | 0      | 0      | 0.9354 | 0.0056 |
| 166 | 5 | 0       | 0.97   | 0.0064 | $9.7756 \times 10^{-10}$ | $7.6211 \times 10^{-10}$ | 0      | 0      | 0.9211 | 0.0069 |
| 167 | 1 | 2.6755  | 0.8961 | 0.0049 | 0                        | 0                        | 0      | 0      | 1      | 0      |
| 168 | 2 | 1.2878  | 0.9246 | 0.0053 | $3.233 \times 10^{-11}$  | $1.2052 \times 10^{-11}$ | 0      | 0      | 1      | 0      |
| 169 | 5 | 0       | 0.9451 | 0.0077 | $1.7978 \times 10^{-9}$  | $1.2254 \times 10^{-9}$  | 0      | 0      | 0.9247 | 0.0074 |
| 170 | 5 | 0       | 0.9386 | 0.0077 | $6.3225 \times 10^{-10}$ | $1.2827 \times 10^{-10}$ | 0      | 0      | 0.8898 | 0.0062 |
| 171 | 5 | 0       | 0.9336 | 0.0065 | $1.0989 \times 10^{-9}$  | $1.946 \times 10^{-10}$  | 0      | 0      | 0.8954 | 0.0059 |
| 172 | 5 | 0       | 0.8123 | 0.0096 | $1.307 \times 10^{-9}$   | $8.5453 \times 10^{-11}$ | 0      | 0      | 0.8902 | 0.0078 |
| 173 | 5 | 0       | 0.602  | 0.0084 | $1.3618 \times 10^{-9}$  | $2.961 \times 10^{-11}$  | 0      | 0      | 0.8427 | 0.0057 |
| 177 | 5 | 0       | 0.0701 | 0.0035 | $6.977 \times 10^{-10}$  | $2.9685 \times 10^{-12}$ | 0      | 0      | 0.7035 | 0.0018 |

**Table S4–S13.** Structural detail of the non-covalent interactions determined from PLIP server (2) for the structural models of the cdM2-1/RNA complexes.

**Table S4: Model 1**

| Hydrogen bonds |              |                |             |           |
|----------------|--------------|----------------|-------------|-----------|
| Residue        | Distance (Å) | Protein Donor? | Side chain? | RNA group |
| Glu71          | 3.84         | ✓              | ✓           | ribose    |
| Gly75          | 3.72         | ✓              | ✗           | phosphate |
| Tyr83          | 2.00         | ✓              | ✓           | phosphate |
| Ile84          | 3.82         | ✗              | ✗           | ribose    |
| Ser86          | 3.24         | ✓              | ✗           | ribose    |
| Thr91          | 3.42         | ✗              | ✓           | base      |
| Thr91          | 3.76         | ✓              | ✓           | base      |
| Thr91          | 3.76         | ✗              | ✓           | base      |
| Gln93          | 3.80         | ✗              | ✗           | base      |
| Gln93          | 3.31         | ✓              | ✓           | base      |
| Ser94          | 3.58         | ✓              | ✓           | base      |
| Ser94          | 3.76         | ✗              | ✓           | base      |
| Val97          | 3.99         | ✗              | ✗           | base      |
| Ser100         | 3.89         | ✓              | ✓           | phosphate |

| Lys150                     | 2.77         | ✓                 | ✓                      | ribose |
|----------------------------|--------------|-------------------|------------------------|--------|
| Lys158                     | 3.68         | ✓                 | ✓                      | base   |
| Lys159                     | 2.30         | ✓                 | ✓                      | ribose |
| $\pi$ -cation interactions |              |                   |                        |        |
| Residue                    | Distance (Å) | Protein charged?  | RNA group              |        |
| Lys150                     | 5.20         | ✓                 | base                   |        |
| Lys158                     | 5.72         | ✓                 | base                   |        |
| Salt bridges               |              |                   |                        |        |
| Residue                    | Distance (Å) | Protein positive? | RNA group              |        |
| Lys92                      | 3.32         | ✓                 | phosphate <sup>1</sup> |        |
| Lys92                      | 3.88         | ✓                 | phosphate <sup>2</sup> |        |
| Lys101                     | 5.09         | ✓                 | phosphate <sup>1</sup> |        |
| Lys101                     | 3.73         | ✓                 | phosphate <sup>2</sup> |        |
| Lys150                     | 3.92         | ✓                 | phosphate <sup>1</sup> |        |
| Lys150                     | 4.39         | ✓                 | phosphate <sup>2</sup> |        |

**Table S5: Model 2**

| Hydrogen bonds             |              |                   |                        |           |
|----------------------------|--------------|-------------------|------------------------|-----------|
| Residue                    | Distance (Å) | Protein Donor?    | Side chain?            | RNA group |
| Ser86                      | 3.47         | ✓                 | ✓                      | phosphate |
| Ser86                      | 3.56         | ✗                 | ✓                      | phosphate |
| Lys92                      | 3.97         | ✓                 | ✓                      | phosphate |
| Lys92                      | 3.34         | ✓                 | ✗                      | Ribose    |
| Ser133                     | 3.43         | ✓                 | ✓                      | phosphate |
| Ser137                     | 2.23         | ✓                 | ✓                      | phosphate |
| Gln144                     | 3.89         | ✓                 | ✓                      | base      |
| Thr145                     | 3.01         | ✗                 | ✗                      | base      |
| Thr145                     | 2.91         | ✓                 | ✓                      | base      |
| Leu148                     | 2.95         | ✗                 | ✗                      | ribose    |
| Arg151                     | 2.35         | ✗                 | ✓                      | base      |
| Lys158                     | 3.01         | ✓                 | ✓                      | ribose    |
| $\pi$ -cation interactions |              |                   |                        |           |
| Residue                    | Distance (Å) | Protein charged?  | RNA group              |           |
| Arg151                     | 4.98         | ✓                 | base                   |           |
| Arg151                     | 4.70         | ✓                 | base                   |           |
| Salt bridges               |              |                   |                        |           |
| Residue                    | Distance (Å) | Protein positive? | RNA group              |           |
| Lys92                      | 3.64         | ✓                 | phosphate <sup>1</sup> |           |
| Lys92                      | 3.39         | ✓                 | phosphate <sup>2</sup> |           |
| Lys143                     | 5.45         | ✓                 | phosphate              |           |
| His147                     | 3.67         | ✓                 | phosphate              |           |
| Lys150                     | 5.05         | ✓                 | phosphate <sup>1</sup> |           |
| Lys150                     | 4.11         | ✓                 | phosphate <sup>2</sup> |           |
| Lys158                     | 2.50         | ✓                 | phosphate              |           |

**Table S6: Model 3**

| Hydrogen bonds |              |                |             |           |
|----------------|--------------|----------------|-------------|-----------|
| Residue        | Distance (Å) | Protein Donor? | Side chain? | RNA group |
| Gly75          | 4.07         | ✗              | ✗           | base      |
| Ser82          | 2.69         | ✗              | ✓           | ribose    |
| Tyr83          | 3.17         | ✓              | ✓           | phosphate |
| Tyr83          | 3.17         | ✗              | ✓           | phosphate |
| Ser86          | 3.22         | ✗              | ✓           | ribose    |
| Asn88          | 2.37         | ✓              | ✓           | phosphate |
| Asn89          | 2.51         | ✓              | ✓           | base      |
| Ile90          | 3.63         | ✗              | ✗           | phosphate |
| Lys92          | 3.76         | ✓              | ✓           | phosphate |
| Thr104         | 3.99         | ✓              | ✓           | ribose    |
| Ser133         | 3.89         | ✓              | ✓           | phosphate |
| Ser133         | 4.07         | ✗              | ✓           | phosphate |
| Lys143         | 4.08         | ✓              | ✓           | base      |
| Gln144         | 2.94         | ✓              | ✓           | base      |
| His147         | 4.01         | ✗              | ✓           | base      |
| Arg151         | 3.30         | ✓              | ✓           | base      |
| Arg151         | 3.92         | ✓              | ✓           | ribose    |
| Arg151         | 3.92         | ✗              | ✓           | ribose    |
| Asp155         | 3.12         | ✓              | ✗           | phosphate |

  

| $\pi$ -cation interactions |              |                  |           |
|----------------------------|--------------|------------------|-----------|
| Residue                    | Distance (Å) | Protein charged? | RNA group |
| Arg151                     | 4.49         | ✓                | base      |

  

| $\pi$ -stacking |              |          |           |
|-----------------|--------------|----------|-----------|
| Residue         | Distance (Å) | Type     | RNA group |
| His168          | 4.39         | T-shaped | base      |

  

| Salt bridges |              |                   |                        |
|--------------|--------------|-------------------|------------------------|
| Residue      | Distance (Å) | Protein positive? | RNA group              |
| Lys92        | 3.00         | ✓                 | phosphate <sup>1</sup> |
| Lys92        | 4.94         | ✓                 | phosphate <sup>2</sup> |
| Lys101       | 2.97         | ✓                 | phosphate              |
| Arg126       | 5.02         | ✓                 | Phosphate <sup>1</sup> |
| Arg126       | 4.46         | ✓                 | Phosphate <sup>2</sup> |
| Lys143       | 4.67         | ✓                 | phosphate              |
| Lys150       | 3.02         | ✓                 | Phosphate <sup>1</sup> |
| Lys150       | 5.37         | ✓                 | Phosphate <sup>2</sup> |
| Lys158       | 5.48         | ✓                 | phosphate              |

**Table S7: Model 4**

| Hydrogen bonds |              |         |      |     |
|----------------|--------------|---------|------|-----|
| Residue        | Distance (Å) | Protein | Side | RNA |



|        |      | Donor? | chain? | group     |
|--------|------|--------|--------|-----------|
| Ser86  | 1.96 | ✗      | ✓      | base      |
| Asn89  | 3.47 | ✓      | ✓      | phosphate |
| Asn89  | 3.76 | ✓      | ✗      | phosphate |
| Thr91  | 3.81 | ✓      | ✓      | ribose    |
| Gln93  | 3.72 | ✓      | ✓      | phosphate |
| Ser100 | 4.05 | ✗      | ✗      | phosphate |
| Thr104 | 3.42 | ✓      | ✓      | phosphate |
| Thr145 | 3.59 | ✓      | ✓      | phosphate |
| Thr160 | 2.99 | ✓      | ✗      | base      |
| Thr160 | 2.07 | ✗      | ✓      | base      |
| Asn163 | 2.59 | ✓      | ✓      | ribose    |
| Asn163 | 4.00 | ✗      | ✓      | ribose    |

Salt bridges

| Residue | Distance (Å) | Protein positive? | RNA group              |
|---------|--------------|-------------------|------------------------|
| Lys150  | 4.52         | ✓                 | phosphate <sup>1</sup> |
| Lys150  | 2.52         | ✓                 | phosphate <sup>2</sup> |

**Table S8:** Model 5

Hydrogen bonds

| Residue | Distance (Å) | Protein Donor? | Side chain? | RNA group |
|---------|--------------|----------------|-------------|-----------|
| Tyr83   | 3.94         | ✓              | ✓           | base      |
| Lys92   | 3.19         | ✓              | ✓           | ribose    |
| Gln93   | 2.03         | ✓              | ✓           | phosphate |
| Gln93   | 3.21         | ✗              | ✓           | phosphate |
| Gln93   | 3.15         | ✗              | ✓           | phosphate |
| Ser122  | 3.93         | ✗              | ✗           | phosphate |
| Arg126  | 3.97         | ✓              | ✓           | base      |
| Arg126  | 3.10         | ✗              | ✗           | phosphate |
| Asn129  | 3.66         | ✓              | ✓           | ribose    |
| Thr130  | 2.80         | ✓              | ✓           | phosphate |
| Lys143  | 3.13         | ✓              | ✓           | ribose    |
| Gln144  | 3.66         | ✓              | ✓           | phosphate |
| Lys150  | 3.46         | ✗              | ✗           | phosphate |
| Lys150  | 2.38         | ✓              | ✓           | phosphate |
| Arg151  | 3.61         | ✗              | ✓           | ribose    |
| Arg151  | 3.62         | ✓              | ✓           | base      |
| Arg151  | 1.65         | ✓              | ✓           | ribose    |
| Ala154  | 4.08         | ✓              | ✗           | ribose    |

$\pi$ -cation interactions

| Residue | Distance (Å) | Protein charged? | RNA group |
|---------|--------------|------------------|-----------|
| Lys150  | 5.17         | ✓                | base      |

Salt bridges

| Residue | Distance (Å) | Protein positive? | RNA group |
|---------|--------------|-------------------|-----------|
| Lys92   | 2.25         | ✓                 | phosphate |

|        |      |   |                        |
|--------|------|---|------------------------|
| Lys143 | 4.36 | ✓ | phosphate              |
| His147 | 3.57 | ✓ | phosphate <sup>1</sup> |
| His147 | 4.97 | ✓ | phosphate <sup>2</sup> |
| Lys150 | 4.77 | ✓ | phosphate <sup>1</sup> |
| Lys150 | 4.76 | ✓ | phosphate <sup>2</sup> |
| Arg151 | 3.87 | ✓ | phosphate <sup>1</sup> |
| Arg151 | 3.98 | ✓ | phosphate <sup>2</sup> |
| Lys159 | 4.37 | ✓ | phosphate              |

**Table S9: Model 6**

| Hydrogen bonds |              |                |             |           |
|----------------|--------------|----------------|-------------|-----------|
| Residue        | Distance (Å) | Protein Donor? | Side chain? | RNA group |
| Ser100         | 3.08         | ✓              | ✓           | phosphate |
| Lys101         | 3.29         | ✓              | ✓           | base      |
| Thr104         | 2.08         | ✗              | ✓           | ribose    |
| Thr104         | 3.48         | ✓              | ✓           | base      |
| Arg126         | 2.97         | ✗              | ✓           | ribose    |
| Ser133         | 3.90         | ✓              | ✓           | ribose    |
| Ser137         | 2.50         | ✓              | ✓           | phosphate |
| Asn138         | 3.21         | ✗              | ✗           | phosphate |
| Asn141         | 3.70         | ✓              | ✓           | phosphate |
| Lys143         | 2.73         | ✓              | ✓           | base      |
| His147         | 3.86         | ✗              | ✓           | base      |
| Arg151         | 2.85         | ✓              | ✓           | base      |
| Val156         | 2.70         | ✗              | ✗           | phosphate |

  

| $\pi$ -cation interactions |              |                  |           |  |
|----------------------------|--------------|------------------|-----------|--|
| Residue                    | Distance (Å) | Protein charged? | RNA group |  |
| Lys101                     | 3.41         | ✓                | base      |  |
| Lys143                     | 2.42         | ✓                | base      |  |

**Table S10: Model 7**

| Hydrogen bonds |              |                |             |           |
|----------------|--------------|----------------|-------------|-----------|
| Residue        | Distance (Å) | Protein Donor? | Side chain? | RNA group |
| Thr91          | 3.58         | ✓              | ✓           | ribose    |
| Ser94          | 3.67         | ✓              | ✓           | phosphate |
| Arg126         | 2.01         | ✓              | ✓           | phosphate |
| Arg126         | 2.37         | ✓              | ✓           | phosphate |
| Arg126         | 2.47         | ✗              | ✓           | phosphate |
| Thr130         | 3.78         | ✓              | ✓           | ribose    |
| Lys143         | 3.11         | ✗              | ✗           | phosphate |
| Lys150         | 2.50         | ✓              | ✗           | phosphate |
| Arg151         | 3.33         | ✓              | ✓           | base      |
| Asp155         | 3.95         | ✗              | ✗           | phosphate |
| Lys159         | 3.42         | ✓              | ✓           | ribose    |
| Asn163         | 3.93         | ✓              | ✓           | ribose    |

| Salt bridges |              |                   |                        |
|--------------|--------------|-------------------|------------------------|
| Residue      | Distance (Å) | Protein positive? | RNA group              |
| Lys92        | 3.56         | ✓                 | phosphate              |
| Lys101       | 5.34         | ✓                 | phosphate <sup>1</sup> |
| Lys101       | 2.80         | ✓                 | phosphate <sup>2</sup> |
| Lys143       | 4.46         | ✓                 | phosphate <sup>1</sup> |
| Lys143       | 5.09         | ✓                 | phosphate <sup>2</sup> |
| Lys150       | 4.16         | ✓                 | phosphate <sup>1</sup> |
| Lys150       | 4.30         | ✓                 | phosphate <sup>2</sup> |
| Lys159       | 4.04         | ✓                 | phosphate              |

**Table S11: Model 8**

| Hydrogen bonds |              |                |             |           |
|----------------|--------------|----------------|-------------|-----------|
| Residue        | Distance (Å) | Protein Donor? | Side chain? | RNA group |
| Tyr83          | 3.82         | ✓              | ✓           | phosphate |
| Ser86          | 3.24         | ✗              | ✓           | base      |
| Asn88          | 3.46         | ✗              | ✗           | ribose    |
| Thr91          | 4.01         | ✓              | ✓           | phosphate |
| Gln93          | 3.54         | ✓              | ✓           | ribose    |
| Ser94          | 3.43         | ✓              | ✓           | phosphate |
| Ser133         | 3.99         | ✓              | ✓           | phosphate |
| Ser133         | 3.99         | ✗              | ✓           | phosphate |
| Asn141         | 3.24         | ✗              | ✓           | ribose    |
| Gln144         | 3.77         | ✗              | ✓           | base      |
| Lys150         | 2.70         | ✓              | ✓           | ribose    |
| Arg151         | 2.14         | ✓              | ✗           | base      |
| Arg151         | 3.75         | ✓              | ✓           | base      |
| Arg151         | 2.82         | ✓              | ✓           | base      |
| Leu152         | 2.85         | ✗              | ✗           | base      |
| Ala154         | 4.00         | ✗              | ✗           | base      |
| Asp155         | 2.82         | ✗              | ✗           | phosphate |
| Val156         | 4.06         | ✗              | ✗           | ribose    |
| Leu157         | 3.23         | ✗              | ✗           | phosphate |
| Lys158         | 3.21         | ✓              | ✓           | base      |
| Lys159         | 2.12         | ✓              | ✓           | base      |

| $\pi$ -cation interactions |              |                  |           |
|----------------------------|--------------|------------------|-----------|
| Residue                    | Distance (Å) | Protein charged? | RNA group |
| Arg151                     | 4.54         | ✓                | base      |

| Salt bridges |              |                   |                        |
|--------------|--------------|-------------------|------------------------|
| Residue      | Distance (Å) | Protein positive? | RNA group              |
| Lys140       | 1.97         | ✓                 | phosphate              |
| Lys143       | 2.56         | ✓                 | phosphate <sup>1</sup> |
| Lys143       | 4.25         | ✓                 | phosphate <sup>2</sup> |
| Lys150       | 4.94         | ✓                 | phosphate              |

**Table S12: Model 9**

| Hydrogen bonds |              |                |             |           |
|----------------|--------------|----------------|-------------|-----------|
| Residue        | Distance (Å) | Protein Donor? | Side chain? | RNA group |
| Tyr83          | 3.99         | ✓              | ✓           | ribose    |
| Ile90          | 3.50         | ✗              | ✗           | ribose    |
| Lys92          | 2.38         | ✓              | ✓           | base      |
| Lys92          | 2.21         | ✓              | ✗           | base      |
| Gln93          | 3.50         | ✗              | ✗           | ribose    |
| Arg126         | 3.97         | ✓              | ✓           | ribose    |
| Asn129         | 4.08         | ✓              | ✓           | ribose    |
| Thr130         | 2.96         | ✗              | ✓           | ribose    |
| Ser137         | 2.42         | ✓              | ✓           | ribose    |
| Asn141         | 2.54         | ✓              | ✓           | phosphate |
| Gln144         | 3.07         | ✓              | ✓           | Phosphate |
| Gln144         | 3.75         | ✗              | ✓           | phosphate |
| Lys150         | 2.75         | ✓              | ✓           | base      |
| Arg151         | 3.58         | ✓              | ✓           | base      |
| Arg151         | 2.45         | ✓              | ✓           | base      |
| Arg151         | 2.24         | ✓              | ✓           | phosphate |
| Asp155         | 3.25         | ✓              | ✗           | base      |
| Asp155         | 3.92         | ✓              | ✓           | base      |
| Asp155         | 3.92         | ✗              | ✓           | base      |
| Val156         | 2.93         | ✓              | ✗           | base      |
| Thr160         | 3.93         | ✗              | ✓           | base      |

  

| $\pi$ -cation interactions |              |                  |           |
|----------------------------|--------------|------------------|-----------|
| Residue                    | Distance (Å) | Protein charged? | RNA group |
| His147                     | 3.63         | ✓                | base      |
| Lys150                     | 2.76         | ✓                | base*     |
| Lys150                     | 3.00         | ✓                | base*     |

  

| Salt bridges |              |                   |                        |
|--------------|--------------|-------------------|------------------------|
| Residue      | Distance (Å) | Protein positive? | RNA group              |
| Lys92        | 3.99         | ✓                 | phosphate <sup>1</sup> |
| Lys92        | 3.84         | ✓                 | phosphate <sup>2</sup> |
| His147       | 5.25         | ✓                 | phosphate              |
| Lys150       | 4.56         | ✓                 | phosphate              |
| Arg151       | 2.50         | ✓                 | phosphate              |

**Table S13: Model 10**

| Hydrogen bonds |              |                |             |           |
|----------------|--------------|----------------|-------------|-----------|
| Residue        | Distance (Å) | Protein Donor? | Side chain? | RNA group |
| Glu81          | 3.25         | ✗              | ✓           | base      |
| Ser82          | 2.42         | ✓              | ✓           | phosphate |
| Tyr83          | 2.34         | ✓              | ✓           | phosphate |
| Ile84          | 2.88         | ✗              | ✗           | base      |
| Gly85          | 2.79         | ✗              | ✗           | base      |

|                                             |              |                   |                        |           |
|---------------------------------------------|--------------|-------------------|------------------------|-----------|
| Asn88                                       | 2.38         | ✗                 | ✓                      | ribose    |
| Asn88                                       | 3.72         | ✓                 | ✓                      | phosphate |
| Thr91                                       | 4.02         | ✓                 | ✗                      | base      |
| Thr91                                       | 3.82         | ✓                 | ✓                      | base      |
| Thr91                                       | 3.82         | ✗                 | ✓                      | base      |
| Lys92                                       | 3.10         | ✓                 | ✗                      | phosphate |
| Arg126                                      | 3.38         | ✓                 | ✓                      | ribose    |
| Thr130                                      | 3.09         | ✓                 | ✓                      | phosphate |
| Lys143                                      | 4.07         | ✓                 | ✓                      | base      |
| Gln144                                      | 3.87         | ✓                 | ✓                      | base      |
| Gln144                                      | 3.88         | ✗                 | ✓                      | base      |
| Lys150                                      | 3.87         | ✓                 | ✓                      | base      |
| Arg151                                      | 3.84         | ✓                 | ✓                      | phosphate |
| Arg151                                      | 4.03         | ✓                 | ✓                      | base      |
| Ala154                                      | 3.61         | ✗                 | ✗                      | phosphate |
| Lys159                                      | 2.72         | ✓                 | ✓                      | ribose    |
| Lys169                                      | 2.10         | ✓                 | ✓                      | base      |
| <b><math>\pi</math>-cation interactions</b> |              |                   |                        |           |
| Residue                                     | Distance (Å) | Protein charged?  | RNA group              |           |
| His147                                      | 4.36         | ✓                 | base                   |           |
| Lys169                                      | 2.78         | ✓                 | base                   |           |
| <b><math>\pi</math>-stacking</b>            |              |                   |                        |           |
| Residue                                     | Distance (Å) | Type              | RNA group              |           |
| His147                                      | 4.42         | parallel          | base                   |           |
| His147                                      | 3.04         | parallel          | base*                  |           |
| His147                                      | 2.90         | parallel          | base*                  |           |
| <b>Salt bridges</b>                         |              |                   |                        |           |
| Residue                                     | Distance (Å) | Protein positive? | RNA group              |           |
| Lys92                                       | 5.08         | ✓                 | phosphate <sup>1</sup> |           |
| Lys92                                       | 4.14         | ✓                 | phosphate <sup>2</sup> |           |
| Lys92                                       | 5.27         | ✓                 | phosphate <sup>3</sup> |           |
| Lys150                                      | 2.53         | ✓                 | phosphate <sup>1</sup> |           |
| Lys150                                      | 4.08         | ✓                 | phosphate <sup>2</sup> |           |
| Lys159                                      | 5.11         | ✓                 | phosphate              |           |

**Table S14.** The primary sequences of 10 RNAs were generated from the Random Sequence Generator (RSG) webserver ([www.molbiotools.com](http://www.molbiotools.com)) setting the length of sequence equal to 40 and AU content at 80%.

| RNA sequences                             |
|-------------------------------------------|
| AUAAGUUUAUUAUUAAAUUCAAAAGUUAACUUUAUAUU    |
| AAACUUUUACAUUUGUUUAUUGAAAAUUUUGAUUAUAGUU  |
| AUCUUUAUAAAUAUCUACAUAUAGGUUGGUUAUUGUUAUAC |
| GUCUAAAUGUAUAUCUCAUAUAUAAUGAAAUACAUCUG    |

AUUAAGCUAAUAAUAUUAUGAGUUUGUAUUGAUUAUGUUU  
ACGAUUUAAAGAUGGAGUACUCACUAUUUUGAUUAUAGAU  
UAUAAAACGAUUAAGAAAUUUUUUAUUAUUAUAGUUUGAA  
GUAGGUUUAGUAUGUAAGUAACCACUAUACAGUUUAAACA  
AAGAUUGUUAAUAAAUCAUGACUUUUUAAAUAUAAAUA  
AGAGUAAAUAUCUUGCUGUAAAUUUACUAAGACAAUAUUUUU

---

## REFERENCES

1. Dosset P, Hus JC, Blackledge M, Marion D. 2000. Efficient analysis of macromolecular rotational diffusion from heteronuclear relaxation data. *J Biomol NMR* 16:23–28.
2. Salentin S, Schreiber S, Haupt VJ, Adasme MF, Schroeder M. 2015. PLIP: Fully automated protein-ligand interaction profiler. *Nucleic Acids Res* 43:W443–W447.
